# Supplementary material for: Development and training of a machine learning algorithm to identify patients at risk for recurrence following an arthroscopic Bankart repair (CLEARER): protocol for a retrospective, multicentre, cohort study
Source: HighWire-hosted journal article supplement (doi:10.1136/bmjopen-2021-055346), 2022-09-01
Supplement: bmjopen-2021-055346supp001_data_supplement.pdf [file bmjopen-2021-055346supp001_data_supplement.pdf]

1 **SUPPLEMENTARY 1** Search strategy2 *PubMed*

|     |                                                                                                                                                                                                                                                                                                                                                                                                                                                                                                                                                                                                                                                                                                                                                                                                                                                                                                                                                                                                                                                                                                                                                                            |           |
|-----|----------------------------------------------------------------------------------------------------------------------------------------------------------------------------------------------------------------------------------------------------------------------------------------------------------------------------------------------------------------------------------------------------------------------------------------------------------------------------------------------------------------------------------------------------------------------------------------------------------------------------------------------------------------------------------------------------------------------------------------------------------------------------------------------------------------------------------------------------------------------------------------------------------------------------------------------------------------------------------------------------------------------------------------------------------------------------------------------------------------------------------------------------------------------------|-----------|
| #17 | Search: <b>#14 AND #15 AND #16</b> Sort by: <b>Most Recent</b>                                                                                                                                                                                                                                                                                                                                                                                                                                                                                                                                                                                                                                                                                                                                                                                                                                                                                                                                                                                                                                                                                                             | 1,768     |
| #16 | Search: ((( <b>"Recurrence"</b> [Mesh] OR <b>recurr*</b> [tiab] OR <b>relaps*</b> [tiab] OR <b>recrudesc*</b> [tiab] OR <b>repeat*</b> [tiab]) AND ( <b>"Joint Dislocations"</b> [Mesh] OR <b>dislocat*</b> [tiab] OR <b>luxat*</b> [tiab] OR <b>instabilit*</b> [tiab])) OR <b>risk*</b> [tiab] OR <b>lesion*</b> [tiab] OR ( <b>hill</b> [tiab] AND <b>sachs</b> [tiab]) OR <b>injur*</b> [tiab] OR <b>Perthes</b> [tiab] OR <b>ALPSA</b> [tiab] OR ( <b>anterior</b> [tiab] AND ( <b>labro</b> [tiab] OR <b>labral</b> [tiab]) AND <b>periosteal</b> [tiab] AND <b>sleeve</b> [tiab] AND <b>avulsion*</b> [tiab]) OR <b>HAGL</b> [tiab] OR ( <b>humeral</b> [tiab] AND <b>avulsion*</b> [tiab] AND <b>glenohumeral</b> [tiab] AND <b>ligament*</b> [tiab]) OR ( <b>greater</b> [tiab] AND <b>tuberosity</b> [tiab]) OR <b>fracture*</b> [tiab] OR <b>"Fractures, Bone"</b> [Mesh] OR <b>"Rotator Cuff"</b> [Mesh] OR ( <b>rotator</b> [tiab] AND <b>cuff</b> [tiab]) OR <b>tear*</b> [tiab] OR <b>age</b> [tiab] OR <b>sport*</b> [tiab] OR <b>laxity</b> [tiab] OR ( <b>glenoid</b> [tiab] AND <b>bone</b> [tiab] AND <b>loss</b> [tiab])) Sort by: <b>Most Recent</b> | 5,603,913 |
| #15 | Search: ( <b>Bankart</b> [tiab] OR <b>"Bankart Lesions/surgery"</b> [Mesh] OR <b>arthroscopic stabilization</b> [tiab] OR <b>arthroscopic stabilisation</b> [tiab] OR <b>labral repair</b> [tiab]) Sort by: <b>Most Recent</b>                                                                                                                                                                                                                                                                                                                                                                                                                                                                                                                                                                                                                                                                                                                                                                                                                                                                                                                                             | 2,300     |
| #14 | Search: ( <b>"Shoulder Dislocation"</b> [Mesh] OR <b>"Shoulder"</b> [Mesh] OR <b>"Shoulder Joint"</b> [Mesh] OR <b>shoulder*</b> [tiab] OR <b>glenohumeral</b> [tiab]) Sort by: <b>Most Recent</b>                                                                                                                                                                                                                                                                                                                                                                                                                                                                                                                                                                                                                                                                                                                                                                                                                                                                                                                                                                         | 82,527    |

3

4 *Embase/Ovid*

|   |                                                                                                  |         |
|---|--------------------------------------------------------------------------------------------------|---------|
| 1 | exp shoulder dislocation/                                                                        | 6512    |
| 2 | exp shoulder/                                                                                    | 83055   |
| 3 | (shoulder* or glenohumeral).ti,ab,kw.                                                            | 101743  |
| 4 | 1 or 2 or 3                                                                                      | 138684  |
| 5 | (Bankart or arthroscopic stabilization or arthroscopic stabilisation or labral repair).ti,ab,kw. | 2813    |
| 6 | Bankart lesion/su [Surgery]                                                                      | 198     |
| 7 | 5 or 6                                                                                           | 2862    |
| 8 | (recurr* or relaps* or recrudesc* or repeat*).ti,ab,kw.                                          | 1930525 |
| 9 | exp joint dislocation/                                                                           | 4059    |

|    |                                                                                                                                                                                                                                                                                                                                                                |         |
|----|----------------------------------------------------------------------------------------------------------------------------------------------------------------------------------------------------------------------------------------------------------------------------------------------------------------------------------------------------------------|---------|
| 10 | (dislocat*or luxat* or instabilit*).ti,ab,kw.                                                                                                                                                                                                                                                                                                                  | 154727  |
| 11 | 9 or 10                                                                                                                                                                                                                                                                                                                                                        | 158430  |
| 12 | 8 and 11                                                                                                                                                                                                                                                                                                                                                       | 19548   |
| 13 | (risk* or lesion* or (hill and sachs) or injur* or Perthes or ALPSA or (anterior and (labro or labral) and periosteal and sleeve and avulsion*) or HAGL or (humeral and avulsion* and glenohumeral and ligament*) or (greater and tuberosity) or fracture* or (rotator and cuff) or tear* or age or sport* or laxity or (glenoid and bone and loss)).ti,ab,kw. | 8234845 |
| 14 | exp fracture/                                                                                                                                                                                                                                                                                                                                                  | 336756  |
| 15 | exp rotator cuff/                                                                                                                                                                                                                                                                                                                                              | 8999    |
| 16 | 12 or 13 or 14 or 15                                                                                                                                                                                                                                                                                                                                           | 8303779 |
| 17 | 4 and 7 and 16                                                                                                                                                                                                                                                                                                                                                 | 2119    |

5

6 *Cochrane Database of Systematic Reviews & Cochrane Central Register of Controlled Trials*

|     |                                                                                                 |        |
|-----|-------------------------------------------------------------------------------------------------|--------|
| #1  | MeSH descriptor: [Shoulder Dislocation] explode all trees                                       | 143    |
| #2  | MeSH descriptor: [Shoulder] explode all trees                                                   | 537    |
| #3  | MeSH descriptor: [Shoulder Joint] explode all trees                                             | 745    |
| #4  | (shoulder* or glenohumeral):ti,ab,kw                                                            | 11763  |
| #5  | #1 OR #2 OR #3 OR #4                                                                            | 11763  |
| #6  | MeSH descriptor: [Bankart Lesions] explode all trees and with qualifier(s): [surgery - SU]      | 3      |
| #7  | (Bankart OR arthroscopic stabilization OR arthroscopic stabilisation OR labral repair):ti,ab,kw | 238    |
| #8  | #6 OR #7                                                                                        | 238    |
| #9  | MeSH descriptor: [Recurrence] explode all trees                                                 | 12084  |
| #10 | (recurr* or relaps* or recrudesc* or repeat*):ti,ab,kw                                          | 159845 |
| #11 | #9 OR #10                                                                                       | 159894 |
| #12 | MeSH descriptor: [Joint Dislocations] explode all trees                                         | 687    |
| #13 | (dislocat*or luxat* or instabilit*):ti,ab,kw                                                    | 5839   |
| #14 | #12 OR #13                                                                                      | 6413   |

|     |                                                                                                                                                                                                                                                                                                                                                               |        |
|-----|---------------------------------------------------------------------------------------------------------------------------------------------------------------------------------------------------------------------------------------------------------------------------------------------------------------------------------------------------------------|--------|
| #15 | #11 AND #14                                                                                                                                                                                                                                                                                                                                                   | 1018   |
| #16 | (risk* or lesion* or (hill and sachs) or injur* or Perthes or ALPSA or (anterior and (labro or labral) and periosteal and sleeve and avulsion*) or HAGL or (humeral and avulsion* and glenohumeral and ligament*) or (greater and tuberosity) or fracture* or (rotator and cuff) or tear* or age or sport* or laxity or (glenoid and bone and loss)):ti,ab,kw | 549185 |
| #17 | MeSH descriptor: [Fractures, Bone] explode all trees                                                                                                                                                                                                                                                                                                          | 6053   |
| #18 | MeSH descriptor: [Rotator Cuff] explode all trees                                                                                                                                                                                                                                                                                                             | 344    |
| #19 | #15 OR #16 OR #17 OR #18                                                                                                                                                                                                                                                                                                                                      | 549508 |
| #20 | #5 AND #8 AND #19                                                                                                                                                                                                                                                                                                                                             | 145    |

7

8 CINAHL/Ebsco

|     |                                                                                                                                                                                                                                                                                                                                                                                                                                                                                                                                                                                                                                                                                                                              |           |
|-----|------------------------------------------------------------------------------------------------------------------------------------------------------------------------------------------------------------------------------------------------------------------------------------------------------------------------------------------------------------------------------------------------------------------------------------------------------------------------------------------------------------------------------------------------------------------------------------------------------------------------------------------------------------------------------------------------------------------------------|-----------|
| S18 | S3 AND S6 AND S17                                                                                                                                                                                                                                                                                                                                                                                                                                                                                                                                                                                                                                                                                                            | 729       |
| S17 | S13 OR S14 OR S15 OR S16                                                                                                                                                                                                                                                                                                                                                                                                                                                                                                                                                                                                                                                                                                     | 1,482,038 |
| S16 | (MH "Rotator Cuff+")                                                                                                                                                                                                                                                                                                                                                                                                                                                                                                                                                                                                                                                                                                         | 3,063     |
| S15 | (MH "Fractures+")                                                                                                                                                                                                                                                                                                                                                                                                                                                                                                                                                                                                                                                                                                            | 58,529    |
| S14 | ( TI (risk* OR lesion* OR (hill AND sachs) OR injur* OR Perthes OR ALPSA OR (anterior AND (labro OR labral) AND periosteal AND sleeve AND avulsion*) OR HAGL OR (humeral AND avulsion* AND glenohumeral AND ligament*) OR (greater AND tuberosity) OR fracture* OR (rotator AND cuff) OR tear* OR age OR sport* OR laxity OR (glenoid AND bone AND loss)) ) OR ( AB (risk* OR lesion* OR (hill AND sachs) OR injur* OR Perthes OR ALPSA OR (anterior AND (labro OR labral) AND periosteal AND sleeve AND avulsion*) OR HAGL OR (humeral AND avulsion* AND glenohumeral AND ligament*) OR (greater AND tuberosity) OR fracture* OR (rotator AND cuff) OR tear* OR age OR sport* OR laxity OR (glenoid AND bone AND loss)) ) ) | 1,469,860 |
| S13 | S9 AND S12                                                                                                                                                                                                                                                                                                                                                                                                                                                                                                                                                                                                                                                                                                                   | 4,294     |
| S12 | S10 OR S11                                                                                                                                                                                                                                                                                                                                                                                                                                                                                                                                                                                                                                                                                                                   | 33,871    |
| S11 | ( TI (dislocat* OR luxat* OR instabilit*) ) OR ( AB (dislocat* OR luxat* OR instabilit*) )                                                                                                                                                                                                                                                                                                                                                                                                                                                                                                                                                                                                                                   | 31,033    |
| S10 | (MH "Dislocations+")                                                                                                                                                                                                                                                                                                                                                                                                                                                                                                                                                                                                                                                                                                         | 8,266     |
| S9  | S7 OR S8                                                                                                                                                                                                                                                                                                                                                                                                                                                                                                                                                                                                                                                                                                                     | 231,945   |

|    |                                                                                                                                                                                                |         |
|----|------------------------------------------------------------------------------------------------------------------------------------------------------------------------------------------------|---------|
| S8 | ( TI (recurr* OR relaps* OR recrudesc* OR repeat*) ) OR ( AB (recurr* OR relaps* OR recrudesc* OR repeat*) )                                                                                   | 212,296 |
| S7 | (MH "Recurrence")                                                                                                                                                                              | 48,901  |
| S6 | S4 OR S5                                                                                                                                                                                       | 1,126   |
| S5 | ( TI (Bankart OR arthroscopic stabilization OR arthroscopic stabilisation OR labral repair) ) OR ( AB (Bankart OR arthroscopic stabilization OR arthroscopic stabilisation OR labral repair) ) | 1,123   |
| S4 | (MH "Bankart Lesions/SU")                                                                                                                                                                      | 58      |
| S3 | S1 OR S2                                                                                                                                                                                       | 30,919  |
| S2 | ( Ti (shoulder* OR glenohumeral) ) OR ( AB (shoulder* OR glenohumeral) )                                                                                                                       | 28,334  |
| S1 | (MH "Shoulder") OR (MH "Shoulder Dislocation") OR (MH "Shoulder Joint+")                                                                                                                       | 12,823  |

9

10 *Web of Science/Clarative*

11 TOPIC: (shoulder\* OR glenohumeral) AND (Bankart or arthroscopic stabilization or  
 12 arthroscopic stabilisation or labral repair) AND (((recurr\* or relaps\* or recrudesc\* or repeat\*)  
 13 AND (dislocat\* or luxat\* or instabilit\*)) OR risk\* or lesion\* or (hill and sachs) or injur\* or  
 14 Perthes or ALPSA or (anterior and (labro or labral) and periosteal and sleeve and avulsion\*)  
 15 or HAGL or (humeral and avulsion\* and glenohumeral and ligament\*) or (greater and  
 16 tuberosity) or fracture\* or (rotator and cuff) or tear\* or age or sport\* or laxity or (glenoid and  
 17 bone and loss))

18

19

| Database                                       | Before deduplication | After deduplication |
|------------------------------------------------|----------------------|---------------------|
| PubMed                                         | 1768                 | 1762                |
| Embase                                         | 2119                 | 580                 |
| Cochrane Database of Systematic Reviews        | 1                    | 0                   |
| Cochrane Central Register of Controlled Trials | 143                  | 51                  |
| CINAHL                                         | 729                  | 55                  |
| Web of science                                 | 2578                 | 1136                |

|              |      |      |
|--------------|------|------|
| <b>Total</b> | 7338 | 3584 |
| 20           |      |      |
| 21           |      |      |

22 **SUPPLEMENTARY 2**

23 The manuscript's authors will collect the following potential risk factors from the databases

24 provided by authors of the Machine Learning Collaboration:

- 25 o Gender (male/female)
- 26 o Age at time of operation (years)
- 27 o Ethnicity
- 28 o Preoperative BMI
- 29 o ASA classification at time of operation (1-4)
- 30 o Epilepsy (yes/no)
- 31 o Hyperlaxity (Beighton score  $< 4$  or  $\geq 4$ )
- 32 o Affected side (right/left/bilateral)
- 33 o Side of operation (right/left/bilateral)
- 34 o Dominance (right/left/both)
- 35 o Daily smoking at time of operation (yes or no)
- 36 o Number of pre-operative dislocations
- 37 o Duration of follow-up (years)
- 38 o Bony lesions
  - 39  Bony Bankart lesion (yes/no)
  - 40  Hill-Sachs lesion
    - 41 • Yes/no
    - 42 • Off-track yes/no
  - 43  Greater Tuberosity Fracture (yes/no)
  - 44  Glenoid bone loss ( $<20\%$ ,  $\geq 20\%$ )
- 45 o Soft tissue lesions
  - 46  Anterior labrum periosteal sleeve avulsion (ALPSA) lesion (yes/no)
  - 47  Superior labrum anterior and posterior (SLAP) lesion (yes/no)
  - 48  inferior glenohumeral ligament (IGHL) (yes/no)

- 49            Humeral avulsion of the glenohumeral ligament (HAGL) lesion (yes/no)
- 50            Perthes lesion (yes/no)
- 51            Glenolabral articular disruption (GLAD) lesion (yes/no)
- 52            Full thickness Rotator Cuff Tear (yes/no)
- 53            Partial thickness Rotator Cuff Tear (yes/no)
- 54      o      Nerve Palsy (yes/no)
- 55      o      Surgical Characteristics:
  - 56      o      Side (right/left/bilateral)
  - 57      o      Time from injury to surgery (months)
  - 58      o      Time to surgery from hospital admission (days)
  - 59      o      Surgeon level (Surgeon/Resident/Fellow)
- 60
- 61
